16 **Summary**

17 A cognitive map, representing an environment around oneself, is necessary for spatial  
18 navigation. However, compared with its constituent elements such as individual landmarks,  
19 neural substrates of coherent spatial information remain largely unknown. The present study  
20 investigated how the brain codes map-like representations in a virtual environment specified by  
21 the relative positions of three objects. Representational similarity analysis revealed an object-  
22 based spatial representation in the hippocampus (HPC) when participants located themselves  
23 within the environment, while the medial prefrontal cortex (mPFC) represented it when they  
24 recollected a target object's location relative to their self-body. During recollection, task-  
25 dependent functional connectivity increased between the two areas implying exchange of self-  
26 and target-location signals between HPC and mPFC. Together, the coherent cognitive map,  
27 which could be formed by objects, may be recruited in HPC and mPFC for complementary  
28 functions during navigation, which may generalize to other aspects of cognition, such as  
29 navigating social interactions.

30

31 **Key words:** cognitive map, spatial navigation, episodic memory, memory-guided decision  
32 making, social interaction, hippocampus, medial prefrontal cortex, default-mode network,  
33 representational similarity analysis.

34

35

36

## 37 **Introduction**

38 During navigation, it is necessary to locate our self-position in the current spatial  
39 environment as well as to locate the objects relative to the self-body (i.e., egocentric  
40 location). To conduct each of the two mental operations, we need map-like representations,  
41 called “cognitive map” in our brain (Tolman, 1948). After the discovery of “place cells,” the  
42 hippocampus (HPC) of the medial temporal lobe (MTL) has been considered responsible for  
43 the cognitive map (Buffalo, 2015), and crucial contributions of the HPC to spatial memory  
44 have also been reported by animal model studies that evaluated behavioral patterns of rodents  
45 with an inactivated HPC using the Morris water maze and cross-maze (Nakazawa et al.,  
46 2002; Packard and McGaugh, 1996; Redish and Touretzky, 1998) as well as human studies  
47 that demonstrated the relationship between HPC volume in individual subjects and their  
48 amounts of experience exploring spatial environments (Woollett and Maguire, 2011; Schinazi  
49 et al., 2013, e.g., London taxi drivers). However, it remains largely unknown how neural  
50 substrates of the cognitive map are involved in the two mental operations required to locate  
51 specific objects within the environment. One possible reason for the difficulty in addressing  
52 this question is that despite extensive studies on the spatial elements related to the cognitive  
53 map (e.g., self-location, head-direction etc.) (O'Keefe and Dostrovsky, 1971; Vass and  
54 Epstein, 2013; Chadwick et al., 2015; Buffalo, 2015; McCormick et al., 2018;), there is still a  
55 lack of sufficient isolation and characterization of the neural signal of the cognitive map  
56 under the previous research paradigms.

57 In addition to the HPC, the role of the medial prefrontal cortex (mPFC) in goal-  
58 directed planning during navigation was demonstrated by a previous human fMRI study that  
59 showed increased connectivity between the HPC and mPFC (Brown et al., 2016). The mPFC  
60 has been long considered as a member of the core-brain system in the retrieval of episodic  
61 memory (Konishi et al., 2000; Eichenbaum, 2017; McCormick et al., 2018), which is an

62 autobiographical memory consisting of spatial, object, and temporal information (Suzuki and  
63 Naya, 2011; Naya and Suzuki, 2011; Squire and Wixted, 2011). Schacter et al. (2007)  
64 suggested an involvement of the mPFC in future-simulation processing and recollection of  
65 past episodes, which depend on mnemonic information stored as declarative memory  
66 including both episodic and semantic memory. Recently, they also showed increased  
67 connectivity between the HPC and mPFC during future simulation (Campbell et al., 2018).  
68 This preceding literature suggests that the HPC and mPFC, which belong to the default-mode  
69 network, work together when remembering stored information (e.g., cognitive map) and  
70 construct the mental representation of goal-directed information (e.g., target-location) from  
71 mnemonic information with the current context (e.g., self-location) (Schacter, 2012).  
72 However, the specific functional role of each of HPC and mPFC during the construction  
73 process (McCormick et al., 2018; Campbell et al., 2018) remain elusive, presumably because  
74 the construction of goal-directed information (e.g., spatial navigation) includes at least two  
75 mental operations described above (locating the self and locating an object target relative to  
76 self-location), as previous experimental paradigms did not dissociate these aspects of  
77 behavior.

78 To address these issues, we aimed to devise a novel 3D spatial-memory task with  
79 spatial environments defined by objects, which would enable us to identify the representation  
80 of the cognitive map and to investigate how it is related to the two mental operations (Fig. 1).  
81 We used a stimulus set consisting of three different human characters throughout the entire  
82 experiment, while the spatial configuration of the three characters was changed in a trial-by-  
83 trial manner. The spatial configuration pattern was referred to as a “*map*” in the present  
84 study (Fig. 1b). In each trial, participants encoded a *map* from the first-person’s view by  
85 walking toward the characters in one of four fixed walking directions (walking period, Fig.  
86 1c, see Methods). Following the walking period, one human character (facing object) was

87 presented on a virtual-environment background with other characters being invisible, which  
88 gave the participants a feeling of facing the presented character in the virtual environment  
89 (i.e., facing period). After a short delay, one of the two remaining characters (targeting  
90 object) was presented without the virtual environment background, and the participants were  
91 required to remember the location of this second human character relative to their self-body  
92 (i.e., targeting period). Thus, the two mental operations were separated into two periods  
93 within a single trial. This task design allowed us to detect the brain regions that distinguished  
94 the spatial configurations of the objects (i.e., *map*) around the participants during the facing  
95 period and targeting period separately. The results of the representational similarity analysis  
96 (RSA; see Methods for details) (Kriegeskorte et al., 2012; Kriegeskorte et al., 2008) showed  
97 that the spatial environment defined by the three objects were represented in the HPC during  
98 the facing period, while it was represented in the mPFC during the targeting period,  
99 suggesting different contributions of the object-based cognitive map to the recollection  
100 between the two brain areas of the default-mode network.

## 101 **Results**

102 The experiment was conducted over two days with 19 participants. On the first day, the  
103 participants were familiarized with the 3D virtual environment and the three human  
104 characters through a head-nodding detection (HND) task (Fig. S1a). In this task, the  
105 participants had the same walking experience as in the spatial-memory task but were  
106 subsequently asked to indicate whether one of the three characters in a photo had nodded its  
107 head during the walking period. On the second day, the participants performed the spatial-  
108 memory task during fMRI scanning (Fig. 1a). To prevent voluntary memorization of the  
109 spatial relationship of the human characters during the walking period, the HND trials were  
110 pseudo-randomly mixed with the spatial-memory trials at the ratio of 1:10, and the  
111 participants were instructed to focus on head-nodding of the human characters during the  
112 walking period in all trials. In each trial, its trial-type (i.e., HND or memory task) became  
113 distinguishable after the walking period by subsequent stimuli. All participants exhibited  
114 ceiling performance with a  $93.6\% \pm 0.02\%$  correct rate (mean  $\pm$  SE,  $n = 19$ ) for the spatial-  
115 memory task and no significant difference was found among each of the task parameters  
116 (e.g., maps, walking directions) (Fig. S1c). All participants also showed accuracy that was  
117 significantly higher than chance level (50%) in both the head-nodding and no head-nodding  
118 trials in the HND task (Fig. S1a). Attempts to memorize the spatial arrangements of the  
119 human characters during scanning were examined using post-scanning questionnaires. All  
120 participants reported that they did not make any voluntary effort to memorize the spatial  
121 relationship of the three human characters nor utilize any special strategy for memorizing it  
122 (Table S2). It should be noted that no participant was able to recall the number of map  
123 patterns they experienced in the experiment even though only three of the six possible  
124 patterns of maps were repeatedly presented to each participant. In addition, no significant  
125 changes in performance was found across four experimental sessions (Fig. S1b;  $F(3,72) =$

126 0.38,  $P = 0.76$ ), suggesting that the participants performed the spatial-memory task with high-  
127 performance from the beginning and did not learn to use a systematic strategy to improve  
128 their performance during the sessions. These behavioral results guarantee that the participants  
129 automatically encoded maps during the walking period when viewing the human characters  
130 attentively to detect head-nodding.

131

### 132 **Neural representation of the cognitive map during locating self-position**

133 We first assessed the map representation during the facing period (4.0 s including the  
134 subsequent delay; Fig. 2a), in which the participants oriented themselves to a presented  
135 human character in the 3D environment. To decode the map information across the whole  
136 brain, we conducted searchlight-based RSA, which compared the multi-voxel pattern  
137 similarities of the “same map” and “different map” between trial pairs across each brain  
138 voxel by drawing a 6 mm radius sphere with each voxel in the spherical center. Map  
139 information was decoded regardless of other task parameters such as the walking direction or  
140 the identity of the facing character by balancing the number of trials with other task  
141 parameters across the same and different map conditions during the scanning as well as  
142 excluding the effects of other task parameters in the regression analysis (see Methods for  
143 details and Table S1 for the regressor list and the averaged  $r^2$  among the regressors in each  
144 GLM). We found a cluster located in the left middle HPC (mHPC; Fig. 2b,  $P < 0.01$ , voxel-  
145 wise threshold;  $P < 0.05$ , cluster-corrected for multiple comparison), suggesting that the map  
146 defined by multiple objects is represented in the HPC. In addition to the mHPC, the  
147 searchlight-based RSA revealed clusters in the insula, angular gyrus, and superior temporal  
148 cortex (Fig. S2b,  $P < 0.01$ , voxel-wise threshold;  $P < 0.05$ , cluster-corrected for multiple  
149 comparison; see discussion). To validate the searchlight-based RSA result showing that the  
150 left mHPC represents map information, we manually segmented the sub-regions in the MTL

151 in each participant's native space (Fig. S4a, top panel) and conducted an independent RSA  
152 within each anatomical mask (see Methods for details). The region of interest (ROI)-based  
153 result also showed that only the left mHPC had a significantly higher pattern similarity to  
154 "same maps" relative to "different maps" among the MTL sub-regions (Fig. S5a;  $t(18) =$   
155  $3.26$ ,  $P = 0.002$ , Bonferroni corrected for multiple comparisons,  $\alpha < 0.05$ ).

156 To examine possible signal input from the MTL sub-regions to the left mHPC for the  
157 map construction, we examined the neural representation of the facing-character identity and  
158 walking direction that the participants perceptually and/or mentally re-experienced during the  
159 facing period based on the post-scanning test (Table S2; Fig. S3a). Searchlight-based RSA  
160 revealed that the bilateral perirhinal cortex (PRC) encoded character identity (Fig. S3b;  $P <$   
161  $0.001$ , initial threshold;  $P < 0.05$ , cluster-corrected for multiple comparison) (Naya et al.,  
162 2001; Suzuki and Naya, 2014), while the parahippocampal cortex (PHC) and left  
163 retrosplenial cortex (RSC) encoded the walking directions reflecting the spatial layout of one  
164 empty and three occupied positions perceived by the participants during the walking period  
165 (Fig. 1c). In the HPC, the left posterior HPC (pHPC) selectively represented the spatial layout  
166 but not the character identity, while the bilateral anterior HPC (aHPC) revealed clusters for  
167 both character identity and spatial layout (Fig. S3b). These results were consistent with the  
168 notion of the "two cortical systems" model suggesting that object identity and spatiotemporal  
169 context are processed in two separate neural systems with the PRC and PHC-RSC as the core  
170 brain regions, with the two different information domains interacting in the HPC (Ranganath  
171 and Ritchey., 2012). Together, the RSA analyses suggest that the MTL is associated with  
172 representing the spatial environment in the following ways: elements such as each object  
173 identity and spatial layout are represented by extrahippocampal areas while the relative  
174 relationship between multi-objects is represented in the HPC, suggesting cognitive map  
175 representation in the HPC.



176

177 **Cognitive map during localizing target**

178 In contrast to locate self-position, a clear difference was found in brain regions responsible  
179 for the map representations when the participants remembered the location of a target  
180 character relative to their self-body (egocentric target location). In contrast to the facing  
181 period, clusters representing the map information were revealed mainly in the Rectus and  
182 Brodmann area 10 of the mPFC (Peak coordinates: 4, 50, -18; t value: 5.62), rather than in  
183 the HPC, during the targeting period. We confirmed that no cluster was found in the MTL  
184 even though a more liberal threshold was used ( $P < 0.01$ , voxel-wise threshold, uncorrected).  
185 To validate this result, we conducted an independent RSA using frontal sub-regions of the  
186 automated anatomical labeling (AAL, Fig. S4a, bottom panel) template as well as manually  
187 segmented MTL sub-regions as ROIs. The result confirmed that the map information was  
188 represented in the rectus of the prefrontal region (Fig. S5a, left:  $t(18) = 3.67$ ,  $P = 0.0008$ ,  
189 right:  $t(18) = 4.49$ ,  $P = 0.0001$ , Bonferroni corrected for multiple comparisons,  $\alpha < 0.05$ ),  
190 while no MTL sub-regions including the left mHPC revealed map representation significantly  
191 during the targeting period. Together with the facing period results, these results revealed a  
192 double dissociation of the HPC and mPFC function in the map representation between the  
193 task demands, implying that the mPFC, rather than the HPC, carried the map information  
194 during the generation of the egocentric location signal of a target character. Our results  
195 indicate that the HPC and mPFC may operate in a complementary manner, supporting the  
196 notion of the “parallel, but interactive cognitive map” between the two brain structures  
197 (Wikenheiser and Schoenbaum., 2016). Outside of the mPFC, we found clusters in the  
198 precuneus and middle temporal gyrus, and the inferior frontal cortex (Fig. 2c, Fig. S2c;  $P <$   
199  $0.001$ , voxel-wise threshold;  $P < 0.05$ , cluster-corrected for multiple comparison). These  
200 three brain regions have been consistently reported to be involved in scene construction

201 during recalling of past experience and imagination of new experiences (Hassabis and  
202 Maguire, 2007; Bird et al., 2010; Gaesser et al., 2013), which is consistent with the post-  
203 scanning report showing that all participants recalled and also imagined the egocentric  
204 positions of the three human characters during the targeting period.

205 As with the facing period, we examined neural representation of targeting character  
206 identity and walking direction during the targeting period and found that the PRC stably  
207 represented character identity (Fig. S3b;  $P < 0.001$ , initial threshold;  $P < 0.05$ , cluster-  
208 corrected for multiple comparison), while we did not find clusters for the spatial layout  
209 depending on the walking direction in the MTL. These results suggested that the HPC did not  
210 construct the map information from its constituent elements during the targeting period.

211

### 212 **Current self-orientation on the map**

213 To compute the egocentric location of a target object (e.g., left, right, or back), information  
214 on the current self-position/orientation on the map is necessary (Fig. 3a). Therefore, we  
215 examined which brain regions were involved in representing such allocentric “heading-  
216 direction” signals (Hargreaves et al., 2005; Wang et al., 2018). Interestingly, while no  
217 significant cluster was revealed during the facing period (facing character; Fig. 3b and  
218 Supplementary Fig. S5b), robust clusters were revealed during the targeting period (Fig. 3b,  $P$   
219  $< 0.001$ , voxel-wise threshold;  $P < 0.05$ , cluster-corrected for multiple comparison). These  
220 clusters were located in the left ERC, bilateral HPC and PHC inside the MTL as well as in  
221 the lateral occipital cortex, parietal cortex, precuneus, and anterior cingulate cortex outside  
222 the MTL (Fig. 3b,  $P < 0.001$ , voxel-wise threshold;  $P < 0.05$ , cluster-corrected for multiple  
223 comparison). These results suggested that a self-orientation signal was induced during the  
224 targeting period, presumably because of the necessity to compute the egocentric target

225 location. This interpretation is consistent with the post-scanning report in which participants  
226 reported imagining their self-orientation on the map only during the targeting period.

227

### 228 **Remembering the egocentric location of a target object**

229 Next, we examined which brain regions signaled the egocentric location (left, right, or back  
230 relative to self-body) of a target object (Fig. 4a). The results revealed robust clusters in both  
231 the mPFC and MTL (Fig. 4a,  $P < 0.001$ , voxel-wise threshold;  $P < 0.05$ , cluster-corrected for  
232 multiple comparison). In the mPFC, we identified the rectus, medial/superior orbitofrontal  
233 cortex, and olfactory cortex. In the MTL, clusters were found in the anterior HPC. Apart from  
234 the mPFC and MTL, clusters were also found in the lateral occipital cortex, inferior parietal  
235 cortex, anterior temporal lobe, premotor cortex, and IPFC (middle and superior PFC). We  
236 also found clusters in the precuneus and posterior parietal cortex, which were previously  
237 reported to represent the egocentric location (Chadwick et al., 2015). The widely distributed  
238 clusters may indicate that the brain regions representing the egocentric target locations can be  
239 involved in either generation of the egocentric-target-location information from multiple  
240 pieces of information (cognitive map, self-orientation, and target character identity) or its  
241 maintenance while preparing for the following response. These distinct functions might be  
242 supported by three different large-scale brain networks: the dorsal attention network,  
243 frontoparietal control network, and default-mode network (Spreng and Schacter., 2011). In  
244 contrast to the robust signal observed across different brain networks for egocentric target-  
245 location, no cluster was revealed for allocentric target location relative to the spatial layout of  
246 the characters (Fig. 4b,  $P < 0.001$ , voxel-wise threshold;  $P < 0.05$ , cluster-corrected for  
247 multiple comparison), which implies that the target location may be directly retrieved in the  
248 form of egocentric coordinates rather than via its allocentric representation.

249

250 **Increased default-mode network connectivity while locating a target compared with**  
251 **self-locating**

252 The present results showed that the MTL and mPFC signaled a coherent map coding a spatial  
253 relationship of the three human characters during the different time periods in which different  
254 task demands were required (i.e., self-locating and target-locating). In addition, the MTL and  
255 mPFC signaled the different location information even during the same targeting period;  
256 MTL areas tended to represent allocentric self-location while the mPFC tended to represent  
257 egocentric target location. To investigate how the different functional contributions of the  
258 MTL and mPFC were substantiated by whole brain large-scale networks, we conducted a  
259 task-based functional connectivity analysis using MTL and mPFC sub-regions as seeds (six  
260 and four, respectively). For each seed, the mean regional bold signals associated with two  
261 TRs in each of facing and targeting period were estimated in each trial, and concatenated  
262 across trials to make its task-based time course, which contains 72 time points (i.e., 2 TRs  $\times$   
263 36 trials) in each session. The task-based time course of the regional signal for each seed was  
264 correlated with each voxel's time course outside the seed and then was averaged across the  
265 four sessions for each participant, generating seed-based connectivity maps for each of facing  
266 and targeting periods (Ranganath et al., 2005). Then, we compared the connectivity between  
267 the two periods across the participants using a permutation test (see Methods for details).

268 First, we examined the connectivity between the MTL and mPFC subregions for each  
269 of task demands, the result indicated a significantly larger connectivity between the medial  
270 orbital frontal cortex and the MTL subregions in the targeting period relative to the facing  
271 period. (aHPC:  $t(18)=4.75$ ,  $P<0.001$ , pHPC:  $t(18)=3.96$ ,  $P<0.001$ , PHC:  $t(18)=6.85$ ,  $P<0.001$ ,  
272 Bonferroni corrected for multiple comparison,  $\alpha<0.05$ ). In addition, both the MTL and  
273 mPFC showed significantly larger connectivity to other brain areas that belong to the default-  
274 mode network and those to the dorsal attention network during the targeting period compared

275 to the facing period (Fig. 5b,  $P < 0.01$ , voxel-wise threshold;  $P < 0.05$ , cluster-corrected for  
276 multiple comparison). By contrast, both the MTL and mPFC showed significantly larger  
277 connectivity to the frontoparietal control network during the facing period relative to the  
278 targeting period (Fig. 5a,  $P < 0.001$ , voxel-wise threshold;  $P < 0.05$ , cluster-corrected for  
279 multiple comparison). These results suggest that both the MTL and mPFC changed their  
280 connectivity to the three functional networks across the two task periods. We next evaluated  
281 the task-based functional connectivity during each task period based on the three functional  
282 network masks (Fig. S4b, Fig. 5a, b, and see method for details). This ROI analysis revealed  
283 that the default-mode network was positively correlated with the MTL ( $t(18) = 7.98$  for  
284 average across the sub-regions within MTL,  $P < 0.001$ ) and mPFC ( $t(18) = 9.63$  for average  
285 across the sub-regions within mPFC,  $P < 0.001$ ) for both time periods with a significant  
286 increase during the targeting period (Fig. 5c & Fig. S6, top panel;  $F(1,72) = 4.51$ ,  $P = 0.03$ ),  
287 regardless of the seeds (MTL or mPFC;  $F(1,72) = 0.00$ ,  $P=0.98$ ). These results suggest that  
288 the default-mode network contributes more to the retrieval of the target location than the self-  
289 location to an external reference during the facing period. In contrast, the frontoparietal  
290 control network showed significantly negative connectivity with the MTL ( $t(18) = -10.50$ ,  $P$   
291  $< 0.001$ ) and mPFC ( $t(18) = -6.55$ ,  $P < 0.001$ ) during both task periods, indicating that the  
292 frontoparietal control network works competitively with MTL and mPFC areas of the  
293 default-mode network. This competitive effect was stronger during the targeting period (Fig.  
294 5c  $F(1,72) = 5.58$ ,  $P = 0.02$ , also see Fig. S6, middle panel;). Interestingly, despite both the  
295 MTL and mPFC being part of the default-mode network, they showed opposite connectivity  
296 patterns to the dorsal attention network during both periods (Fig. 5c & Fig. S6, bottom panel;  
297  $F(1,72) = 55.07$ ,  $P < 0.001$ ); the MTL positively with the network while the mPFC negatively  
298 correlated with it. The connectivity between the MTL and the dorsal attention network  
299 increased from the facing to targeting period ( $F(1,72) = 8.43$ ,  $P = 0.005$ ). These results

300 suggested that the dorsal attention network, which contains the superior parietal lobule (SPL)  
301 that represented egocentric target location (Fig. 4a), showed increased coupling with the  
302 MTL during the targeting period. On the other hand, the mPFC only attenuated its amplitude  
303 of anti-correlated connectivity with the dorsal attention network, which may suggest that  
304 egocentric target location represented in the mPFC was not directly transmitted to the dorsal  
305 attention network. Considering the increased coupling between the mPFC and default-mode  
306 network including MTL areas during the targeting period (Fig. 5b&c), we hypothesize that  
307 the egocentric target location might be transferred from the mPFC to the SPL via the MTL.

## 308 **Discussion**

309 In this study, we examined neural representations of space defined by three objects and found  
310 that both the HPC and mPFC represented the object-based space around the participants.  
311 Interestingly, the HPC represented the object-based map when the participants locate their  
312 self-body in the environment constructed by the three objects, while the mPFC represented  
313 the map when the participants remembered the location of a target object relative to the self-  
314 body. These results suggest that the cognitive maps in different brain regions play different  
315 functional roles. In addition, during the targeting period, we found differential spatial  
316 representations across the MTL and mPFC: the MTL generally reinstated allocentric self-  
317 location, while the mPFC represented egocentric target location relative to self-location.  
318 Increased functional connectivity was observed between the MTL and mPFC under the  
319 necessity of the retrieval of the target location from the stored memory (targeting period)  
320 compared to when they actually faced the reference object to locate their self-body (facing  
321 period). These results suggest that mental representations of the external world formed by the  
322 coherent space and its constituent elements may be shared in the default-mode network  
323 including the MTL and mPFC. The special role of the mPFC in this scheme might be to  
324 select the object location based on the mnemonic information including the cognitive map  
325 and current self-location on it, which might be propagated from the MTL.

326 To examine the representation of spatial “*maps*” (Fig. 1b), the present task was  
327 designed to cancel out effects of a particular encoding experience related with the walking  
328 direction as well as a particular object identity that the participants viewed during the facing  
329 and targeting periods in each trial by balancing number of trials with each of those  
330 confounding factors in each map (see Methods). Therefore, the neural representation of the  
331 map information revealed by the RSA could not be explained by perceptual information in  
332 the present study. Moreover, the participants always stood on the center of the virtual

333 environment during the facing and targeting periods, during which the map effect was  
334 examined. Because of this task design, the map information does not directly indicate self-  
335 location information like place fields of place cells in the HPC (O'Keefe and Dostrovsky,  
336 1971). On the other hand, the representations of place-fields are reportedly influenced by the  
337 animal's cognitive map, and the existence of cognitive maps could be most clearly  
338 demonstrated by a phenomenon known as "remapping", which reportedly occurs in  
339 populations of place cells in the rodent HPC (Moser et al., 2017). Therefore, it might be  
340 reasonable to interpret the map representations in the left mHPC during the facing period as  
341 experimental evidence of "remapping" of place cells in the human HPC even though the  
342 participants stood in the same position. However, holding this interpretation predicts that  
343 human place cells are localized in the left mHPC. This prediction is against consistent  
344 evidence from previous human studies reporting that the right HPC was more involved in  
345 encoding and retrieving spatial information than the left HPC (Abrahams et al., 1997;  
346 Maguire et al., 1997; Ekstrom et al., 2003; Doeller et al., 2008; Schinazi, 2013). The other  
347 possible interpretation for the map representation in the left mHPC is that it may encode an  
348 allocentric spatial relationship of the three objects itself. This interpretation is consistent with  
349 previous human imaging studies reporting contributions of the left HPC to the imagination of  
350 visual scenes, which could be constructed from multiple spatial elements (Addis et al., 2007;  
351 Bird et al., 2010). The specific role of the left HPC in relational memory was also reported in  
352 non-spatial information domains, including associative learning (Kumaran et al., 2009;  
353 Suarez-Jimenez et al., 2018) and social interactions (Tavares et al., 2015;). Taken together, it  
354 might be more reasonable to interpret that the clusters in the left mHPC was related to a  
355 coherent space constructed by the multiple objects rather than its influence on representations  
356 of individual spatial elements such as self-location or head direction. RSA also suggested the  
357 involvement of the PRC and PHC in MTL signaling the object identity and egocentric view



358 of their spatial layout, respectively, which might be used for constructing the coherent map  
359 from its constituents in the left mHPC. Future studies should address how the coherent map  
360 can be constructed by multiple objects in the MTL.

361 In contrast to the facing period, the representation of the map information was found  
362 in the mPFC but not in the HPC during the targeting period. In addition, the mPFC signaled  
363 the egocentric location of a targeting object, while the MTL concurrently signaled the  
364 allocentric self-location. Involvement of the mPFC in constructing goal-directed information  
365 in the current context is consistent with accumulating evidence showing that the mPFC  
366 contributes to decision making or action selection (Saxena et al., 1998; Gallagher et al., 1999;  
367 Feierstein, 2006; Spiers and Maguire, 2007; Kable and Glimcher, 2009; Young and Shapiro,  
368 2011; Balaguer et al., 2016; Yamada et al., 2018). These previous studies consistently  
369 supported the notion that the mPFC function becomes obvious when an appropriate selection  
370 requires mnemonic information in addition to incoming perceptual information (Bradfield,  
371 2015). In this study, together with perceptual information responsible for target object  
372 identity, mnemonic information such as the map information and allocentric self-location was  
373 required to solve the task. Considering that the MTL could provide all the necessary  
374 mnemonic information, a reasonable interpretation is that the mPFC was involved in the  
375 selection of a target location among alternatives rather than the recollection or generation of  
376 it.

377 In addition to the HPC and mPFC, the map information has been observed in other  
378 brain areas such as the angular gyrus (Seghier, 2013; Price et al., 2016), lateral temporal  
379 gyrus (Karnath, 2001; Himmelbach et al., 2006), and precuneus (Cavanna and Trimble, 2006)  
380 that also belong to the default-mode network. The brain areas in the default-mode network,  
381 particularly the MTL sub-regions except for the PRC represented allocentric self-location

382 during the targeting period. On the other hand, RSA analysis showed that widely-distributed  
383 brain regions were involved in the representation of the egocentric target object location not  
384 only in the default-mode network but also in the dorsal attention network and frontoparietal  
385 control network. The positive and negative functional connectivity between the dorsal  
386 attention network and the MTL and mPFC suggest that the egocentric target location signal is  
387 transmitted from the mPFC to the brain regions of the dorsal attention network, such as the  
388 SPL (Evans et al., 2016), via the MTL, which implies a pivotal functional role of MTL as a  
389 hub of mental representation of object signals.

390         Interestingly, the frontoparietal control network showed a strong negative correlation  
391 with both the MTL and mPFC during both the facing and targeting periods, although the  
392 IPFC in the frontoparietal control network represented both the map information and  
393 egocentric direction during the targeting period. In addition, the IPFC represented walking  
394 direction as well as character identity during both periods. These results suggest that the IPFC  
395 computes the target location independently of the default-mode network. The parallel  
396 contributions of the IPFC and MTL-mPFC in choosing the target location may reflect their  
397 different cognitive functions (Jimura et al., 2004). IPFC has long been considered as a center  
398 of executive functions (Funahashi, 2017; Miller et al., 2018) equipped with working memory  
399 (Andrews et al., 2011; Barbey et al., 2013; Brunoni and Vanderhasselt, 2014; Funahashi,  
400 2017). In human fMRI studies, the IPFC has been shown to contribute to the retrieval of task-  
401 relevant information when more systematic thinking is required (Epstein et al., 2017; Javadi  
402 et al., 2017). In the present study, the behavioral task was designed to ensure participants  
403 neither actively maintained a spatial configuration of the human characters during the  
404 walking period nor any systematic strategy to solve the task, which was confirmed by the  
405 post-scanning test results. The greater signal for the cognitive map and the egocentric target  
406 location in the mPFC than that in the IPFC may reflect that the current spatial memory task

407 was enough easy to allow participants to depend only on the involuntary encoding and  
408 subsequent memory retrieval for their top-ceiling performance (Epstein et al., 2017; Javadi et  
409 al., 2017).

410 In contrast to previous memory/navigation studies, which examined brain functions  
411 using spatial environments consisting of immobile landmarks (e.g., stores) and/or landscapes  
412 (e.g., mountains) (Bird et al., 2010; Woollett and Maguire, 2011; Schinazi et al., 2013;  
413 Chadwick et al., 2015; Brown et al., 2016), the present study used a spatial environment  
414 constructed by only mobile objects that could become targets and references of self-location  
415 as well as determine the space (i.e., map) around oneself. This task design allowed us to  
416 extract a mental representation of the spatial environment consisting of the minimum  
417 essential constituents. This reductionist method could be useful for future studies  
418 investigating the construction and functional mechanisms of a cognitive map because of its  
419 simplicity. One critical concern might be whether the findings discovered by this reductionist  
420 method can be applied to a more complicated cognitive map consisting of large numbers of  
421 immobile spatial elements, which could be learned through extensive explorations over a  
422 long time period (e.g., the city of London) (Woollett and Maguire, 2011). Another related  
423 concern might be whether our brain system holds only one cognitive map or multiple ones at  
424 a time (Meister and Buffalo, 2018). For example, we may hold an object-based cognitive map  
425 consisting of relevant mobile objects such as same species, predators, and foods, while we  
426 may also hold the other cognitive map consisting of landmarks, landscapes and other  
427 immobile objects such as trees. Future studies should address the relationships of different  
428 types of cognitive maps (e.g., mobile vs immobile, short-term vs. long-term) and their  
429 underlying neural mechanisms.

430 The present study found neural representations of the space specified by objects  
431 around us. This object-based cognitive map seems to interact with representation of self-

432 location in HPC and to mediate a selection of egocentric target-location in mPFC, which  
433 would serve for leading us to the goal position. In addition to the spatial navigation, an  
434 existence of the object-based cognitive map may equip us with a space representation for  
435 persons separately from the background, which may serve for our social interactions  
436 (Damasio et al., 1994; Stolk et al., 2015) as well as the encoding and retrieval of episodic  
437 memory (Tulving, 2002; Squire and Wixted, 2011).

438

### 439 **Supplemental Information**

440 Supplemental Information includes six figures, two tables and two videos. The videos contain  
441 trial examples for Day 1 and Day 2. In the video of day 1, please note we only used examples  
442 of correct trials in which a green square of line was presented as feedback after the  
443 participant's response. File size: 21.5 MB; Video duration: 1.23 minute; File format: .mp4;  
444 Video codec: H.264; Aspect ratio: 1024 x 768.

### 445 **Author Contributions**

446 B.Z. and Y.N made the experimental design; B.Z. conducted all experiments and data  
447 analysis under supervision of Y.N.; B.Z. and Y.N. wrote the paper.

448

### 449 **Acknowledgments**

450 The present study was funded by National Natural Science Foundation of China Grant  
451 31421003 (to Y.N.). Computational work was supported by resources provided by the High-  
452 performance Computing Platform of Peking University. We thank Li Sheng and Sun Pei for

453 helpful discussions, we also thank Arielle Tambini, Lusha Zhu, Koji Jimura, Rei Akaishi and  
454 Cen Yang for comments on an early version of the manuscript.

455 **Main figures**

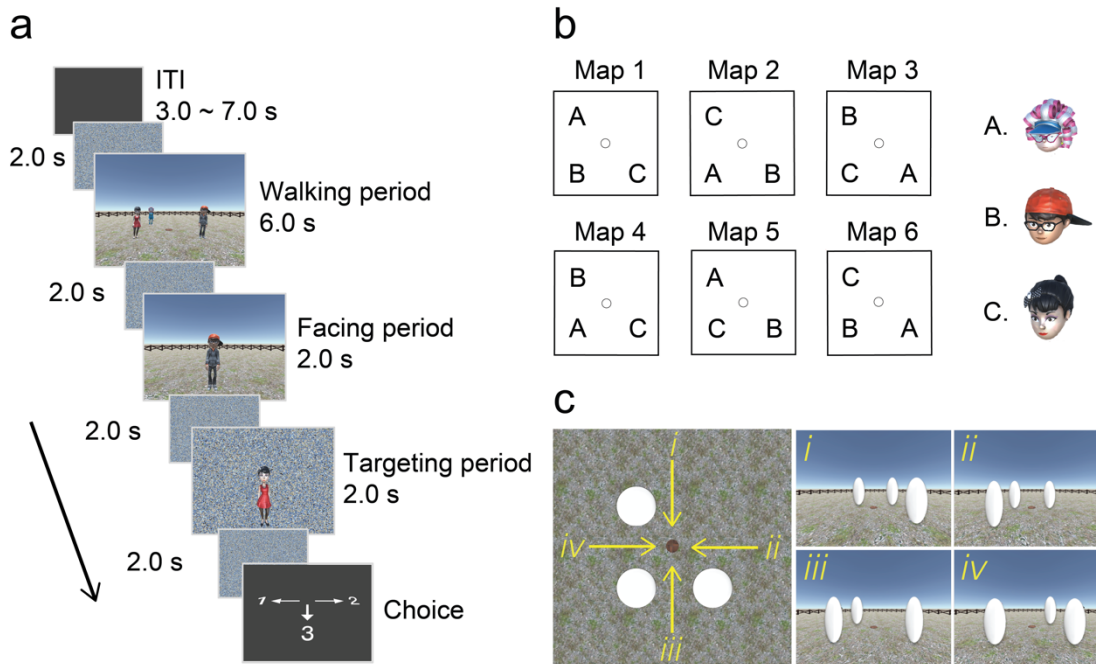

456

457 Figure 1: Task design. (a) spatial-memory task. Each trial consisted of three periods. In the  
 458 walking period, participants walked toward three human characters using the first-person  
 459 perspective and stopped on a wood plate. In the facing period, one of the human characters  
 460 was presented, indicating the participant's current self-orientation. In the targeting period, a  
 461 photo of another character was presented on the scrambled background. The participants  
 462 chose the direction of the target character relative to their body upon presentation of a  
 463 response cue. (b) Maps were defined by the relative position of the three human characters,  
 464 while the unfilled dot represents the wood plate. (c) The walking directions were defined by  
 465 the spatial layout of the three human characters from the participant's first-person  
 466 perspective.

467

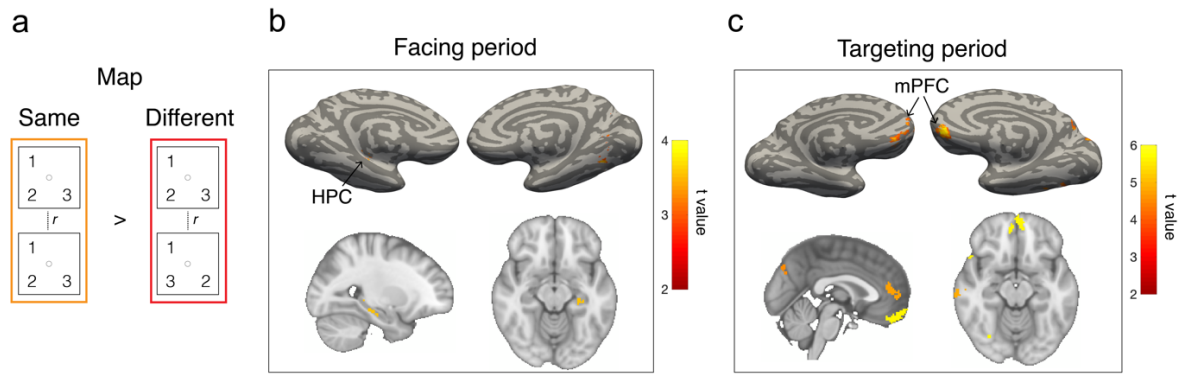

468

469 Figure 2: Neural representation of the map information in MTL and mPFC. (a) Schematic  
470 representation of decoding the cognitive map using RSA. (b) In the facing period, RSA  
471 revealed a cluster in the left middle HPC (mHPC; MNI coordinates: -28,-27,-16; shown on  
472 sagittal and transverse section) within the MTL ( $P < 0.01$ , initial threshold;  $P < 0.05$ , cluster-  
473 corrected for multiple comparison). (c) In the targeting period, clusters were revealed in the  
474 mPFC but not in the MTL ( $P < 0.001$ , initial threshold;  $P < 0.05$ , cluster-corrected for  
475 multiple comparison). A peak was revealed in the rectus within the mPFC (t value: 5.62;  
476 MNI coordinates: 4, 50, -18).

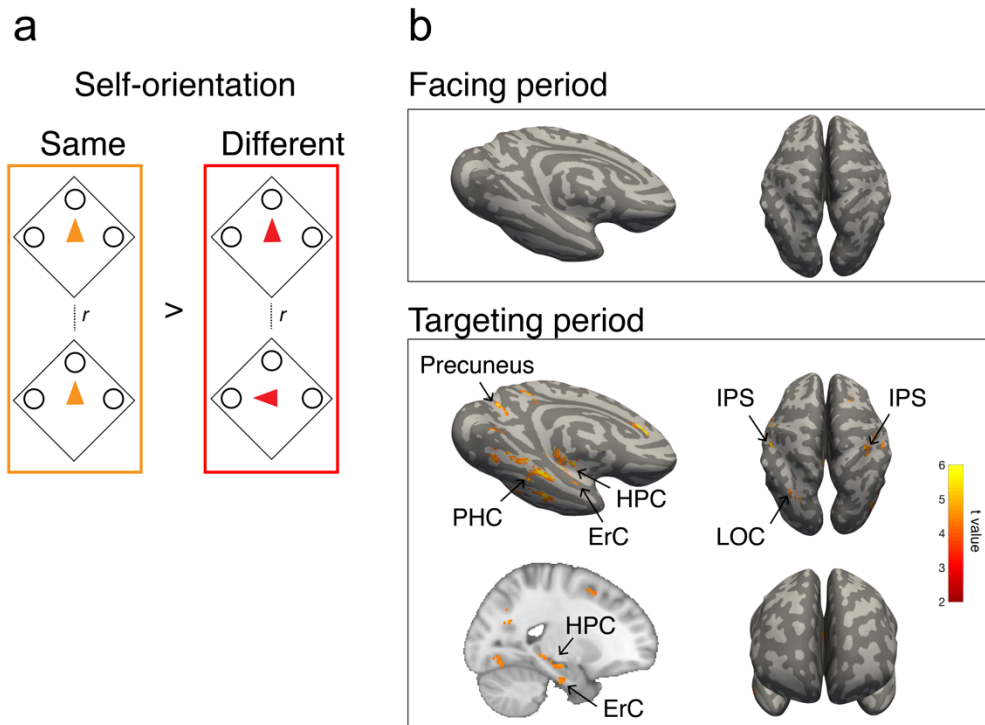

477

478 Figure 3: Neural representation of self-orientation on cognitive map. (a) Schematic  
479 representation of decoding participants' self-orientation. (b) In the facing period, no cluster  
480 was revealed even with the use of a more liberal threshold ( $P < 0.01$ , initial threshold;  $P <$   
481  $0.05$ , cluster-corrected for multiple comparison). In the targeting period, clusters were  
482 revealed in the MTL (bilateral HPC, PHC, and left ErC) and self-motion areas (inferior  
483 parietal cortex, RSC, and lateral occipital cortex).



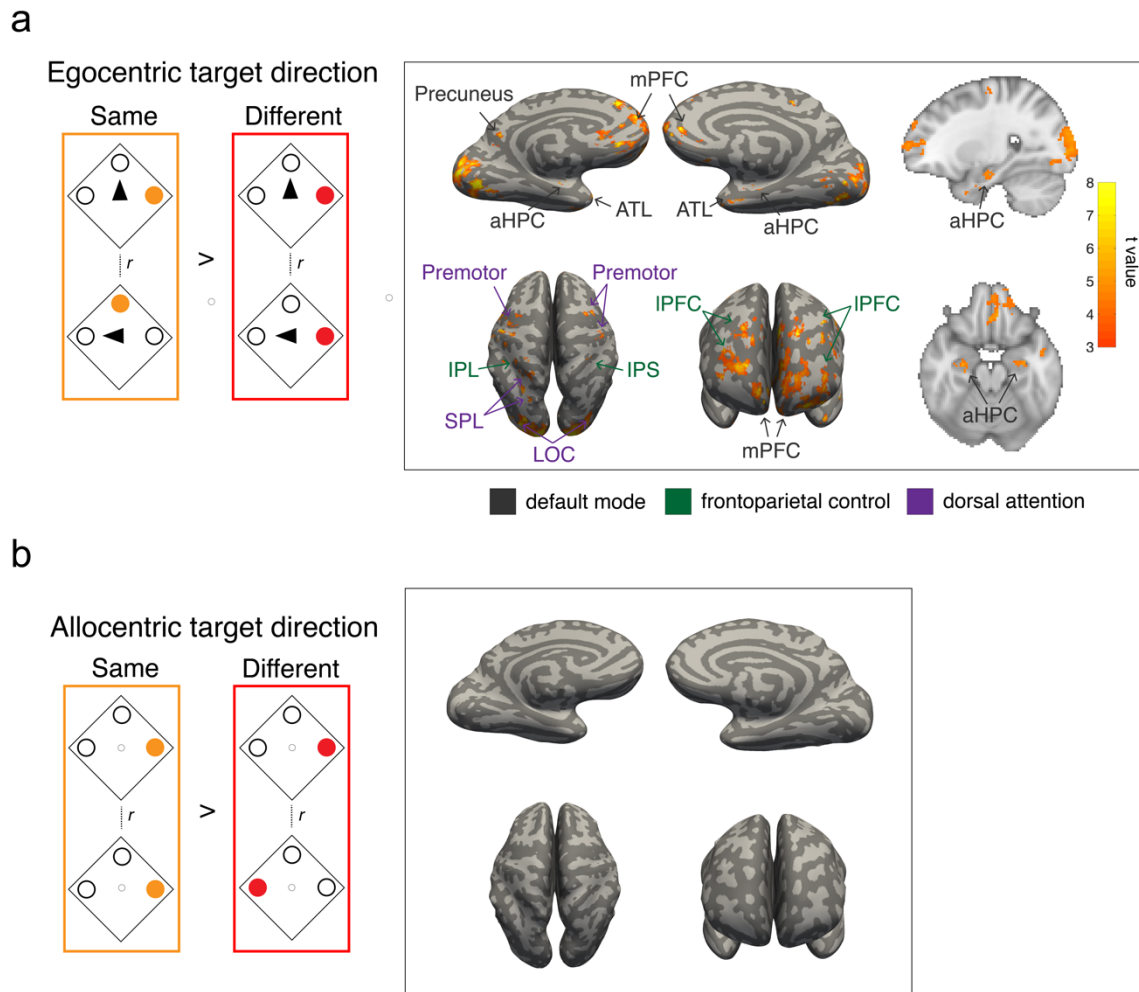

484

485 Figure 4: Neural representation of retrieved egocentric target location. (a) Left panel:

486 Schematic representation of decoding the egocentric direction of a target character. Right

487 panel: Clusters were revealed across a wide range of brain areas ( $P < 0.001$ , initial threshold;

488  $P < 0.05$ , cluster-corrected for multiple comparison). Many of the clusters belonged to one of

489 the following three functional networks: the default-mode network, frontoparietal control

490 network, and dorsal attention network. The aHPC is shown on sagittal and transverse section

491 of volum image for display purpose ( $P < 0.001$ , initial threshold;  $P < 0.05$ , cluster-corrected

492 for multiple comparison). (b) Left panel: Schematic representation of decoding alloentric

493 direction of a target character . Right panel: No clusters were revealed even with the use of a

494 liberal threshold ( $P < 0.01$ , initial threshold;  $P < 0.05$ , cluster-corrected for multiple

495 comparison).

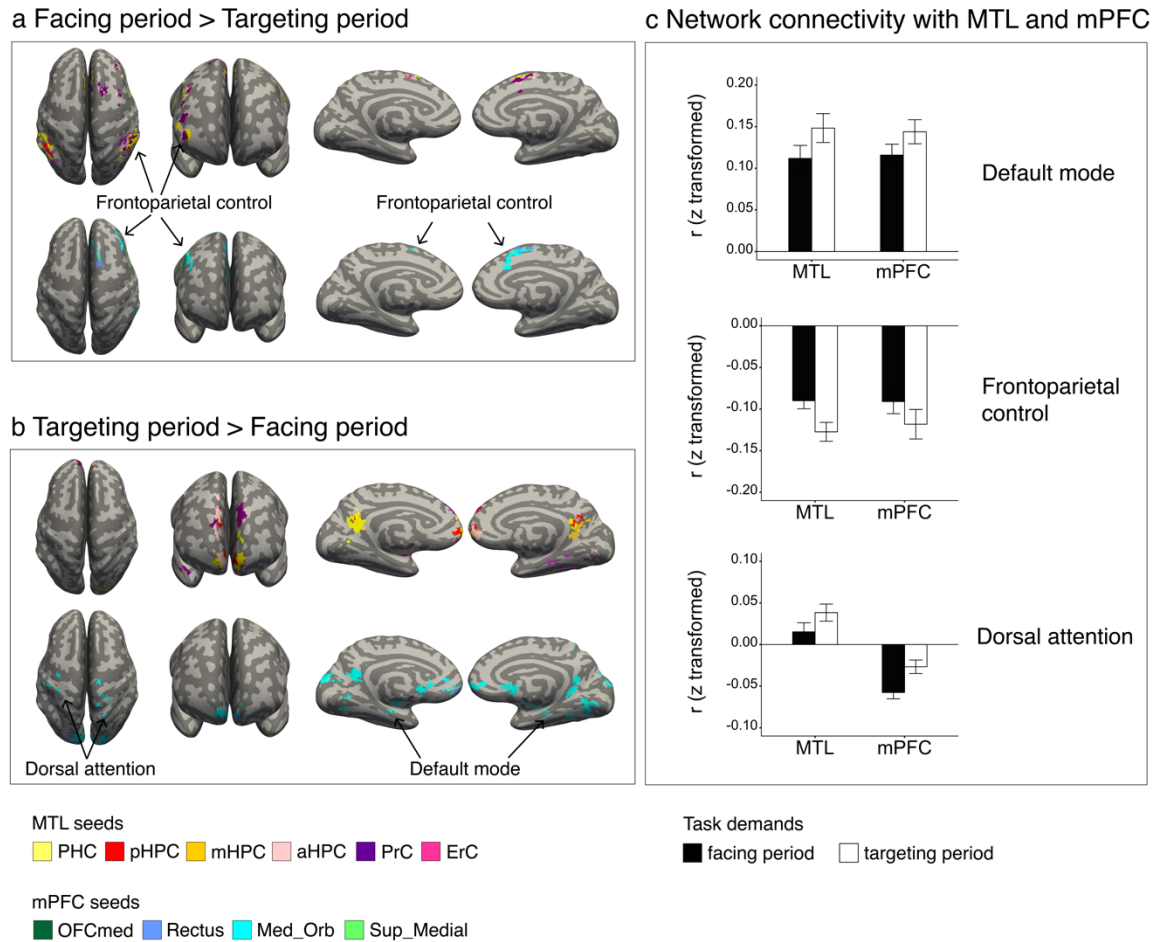

496

497 Figure 5: Increased default-mode network connectivity while locating a target compared with  
 498 locating oneself. (a) The frontoparietal control network showed enhanced connectivity  
 499 strength with the MTL and mPFC in the facing period compared to the targeting period ( $P <$   
 500  $0.001$ , initial threshold;  $P < 0.05$ , cluster-corrected for multiple comparison). (b) The default-  
 501 mode network and dorsal attention network showed enhanced connectivity strength with the  
 502 MTL and mPFC in the targeting period compared to the facing period ( $P < 0.001$ , initial  
 503 threshold;  $P < 0.05$ , cluster-corrected for multiple comparison). (c) The mean connectivity  
 504 strength of MTL and mPFC sub-regions with three networks, respectively. Note that the  
 505 connectivity between default-mode network and MTL/mPFC was examined using default-  
 506 mode network mask without the MTL/mPFC, respectively.

507

508 **Methods**

509

510 **Participants**

511 Nineteen right-handed university students with normal or corrected-to-normal vision were  
512 recruited from Peking University (12 females, 7 males). The average age of the participants  
513 was 24.9 years (range: 18–30 years). All participants had no history of psychiatric or  
514 neurological disorders and gave their written informed consent prior to the start of the  
515 experiment, which was approved by the Research Ethics Committee of Peking University.

516

517 **Task design**

518 *Virtual environment.* We programmed a 3D virtual environment using Unity software (Unity  
519 Technologies, San Francisco). The environment was designed with a circular fence as a  
520 boundary (48 virtual meters in diameter), a flat grassy ground, a uniform blue sky, and with a  
521 wood plate surrounded by four vertices of a square placed in the center (Fig. 1b, 4.7 virtual  
522 meters for side length). Three human characters (Mixamo, San Francisco,  
523 <https://www.mixamo.com>) were placed on three of the vertices in each trial. A map was  
524 defined by the relative relationship of the three human characters (Fig. 1b). From the six  
525 possible maps, three of them were pseudo-randomly selected for each participant to collect  
526 enough number of trials' data for each condition during the allowable range of scanning  
527 duration. The maps were the only environmental cues relevant to the task requirement, no  
528 distal cues were used outside the boundary. Participants performed the task using the first-  
529 person perspective with a 90° field of view (aspect ratio = 4:3), they had never seen a top-  
530 down view of the virtual environment.

531 *Walking period.* Participants walked from one of four starting locations near the circular  
532 boundary (4 virtual meters from the boundary) toward the human characters (Fig. 1c) and

533 stopped on the wood plate. The visual stimuli (spatial environment viewed from first-person  
534 perspective) were determined by the combination of the map and walking direction, in other  
535 words, each map was presented by four different visual stimuli that were determined by the  
536 starting position (Fig. 1c). Importantly, participants were blinded to the map concept  
537 throughout the task. The walking period lasted for 6.0 s, during which each character had a  
538 20.6% probability of nodding its head at a random time point between the start and end of  
539 walking. There was a 50%, 38.9%, 10.2%, and 0.9% probability for 0, 1, 2, and 3 characters  
540 to nod head in each trial; we subjectively selected a 20.6% head-nodding probability for each  
541 character to ensure an approximately equal number of trials with head-nodding and no head-  
542 nodding. During the walking period, participants were required to pay attention to the heads  
543 of the human characters rather than to memorize their spatial arrangement. The height of the  
544 participants was 1.8 virtual meters from the ground, which was the same as that of the human  
545 characters. No response was required during the walking period.

546 Two tasks were completed in two consecutive days. On day 1, the participants  
547 performed an HND task that did not include spatial-memory trials. On day 2, participants  
548 performed a spatial-memory task.

549 *Head-nodding detection (HND) task.* Participants performed 144 randomly ordered HND  
550 trials in a behavioral experimental room. In each trial, a photo of one of the characters was  
551 presented on a screen after the walking period, and participants were asked to indicate  
552 whether the character nodded its head or not (Fig. S1a). For this task, there was a 50% chance  
553 that the character in the presented photo nodded its head. Feedback was given after the  
554 participants had responded with either green (correct) or red (incorrect) photo border. The  
555 stimuli were rendered on a PC and presented on a 27-inch LCD monitor (ViewSonic  
556 XG2730) with a screen resolution of 1024 x 768. The HND task was used to examine  
557 whether participants paid attention to head-nodding rather than memorizing the spatial

558 arrangement of the characters, which would be indicated by high success rates in the head-  
559 nodding test.

560 *Spatial-memory task.* During this task, participants performed 144 spatial-memory  
561 trials (90%) and 16 HND trials (10%) that lasted ~ 70 min in an MRI scanner. Participants  
562 were notified that the remuneration depended only on the performance in the HND trials  
563 although they were also encouraged to perform the spatial memory task as best as they could  
564 (videos of trial examples are available online for both tasks). The trial-type (i.e., HND or  
565 memory task) was distinguishable after the walking period by subsequent stimuli. In the  
566 spatial-memory task, participants experienced a “facing period” and a “targeting period”  
567 sequentially after the walking period. In the facing period, their self-orientation was changed  
568 immediately to one of the human characters (facing-character) without viewpoint transition,  
569 and a character with the environment background was presented for 2.0 s with the other two  
570 characters being invisible, the participants were instructed to face the character. In the  
571 targeting period, a photo of another character (targeting-character) was presented as a target  
572 on a scrabbled background for 2.0 s. Each of the three experimental periods was followed by  
573 a 2.0-s delay (noise screen). At the end of each trial, participants indicated the direction of the  
574 target character relative to their self-body by pressing a button when a cue presented on the  
575 screen; no feedback was shown for both trial-types (Fig. 1a). The spatial-memory task  
576 contained four experimental sessions, each containing a spatial information combination of 3  
577 maps x 4 walking directions x 3 facing-character identities in each session, with targeting-  
578 characters balanced across sessions. After scanning, all participants completed a post-  
579 scanning interview and reported the strategy they used to perform the task (Table. S2).

580

581 **fMRI data acquisition**

582 Imaging data were collected using a 3T Siemens Prisma scanner equipped with a 20-channel  
583 receiver head coil. Functional data were acquired with a Multi-band Echo Planer imaging  
584 (EPI) sequence (TR = 2000 ms, TE = 30 ms, matrix size:  $112 \times 112 \times 62$ , flip angle:  $90^\circ$ , gap  
585 = 0 mm; resolution:  $2 \times 2 \times 2.3 \text{ mm}^3$ , number of slices: 62, slice thickness: 2 mm, slice  
586 orientation: transversal), four experimental sessions were collected with, on average, 478,  
587 476, 473, 475 TRs, respectively. A high-resolution T1-weighted three-dimensional  
588 anatomical data set was collected to aid in registration (MPRAGE, TR = 2530 ms, TE = 2.98  
589 ms, matrix size:  $448 \times 512 \times 192$ , flip angle:  $7^\circ$ , resolution:  $0.5 \times 0.5 \times 1 \text{ mm}^3$ , number of  
590 slices: 192, slice thickness: 1 mm, slice orientation: sagittal). During scanning, experimental  
591 stimuli were presented through a Sinorad LCD projector (Shenzhen Sinorad Medical  
592 Electronics) onto a 33-inch rear-projection screen located over the subject's head with a  
593 resolution of  $1024 \times 768$  and viewed with an angled mirror positioning on the head coil.

594

### 595 **fMRI preprocessing**

596 Functional data for each session were preprocessed independently using FSL FEAT  
597 (FMRIB's Software Library, version 6.00, <https://fsl.fmrib.ox.ac.uk/fsl/fslwiki>; Woolrich et  
598 al., 2001; Woolrich et al., 2004). For each session, the first three functional volumes were  
599 discarded to allow for T1 equilibration, and the remaining functional volumes were slice-time  
600 corrected, realigned to the first image, and high-pass filtered at 100 s. For group-level  
601 statistics, each session's functional data were registered to a T1-weighted standard image  
602 (MNI152) using FSL FLIRT (Jenkinson and Smith, 2001), and this procedure also resampled  
603 the functional voxels into a  $2 \times 2 \times 2 \text{ mm}$  resolution. For RSA, data were left unsmoothed to  
604 preserve any fine-grained spatial information (Chadwick et al., 2012). For functional  
605 connectivity analysis, data were smoothed using a 5 mm FWHM Gaussian kernel and were  
606 high-pass filtered at 0.01 Hz to remove low-frequency signal drifts.

607

608 **Anatomical masks**

609 We manually delineated the MTL, including the HPC, PHC, PRC, and ERC on each  
610 participant's native space using established protocols (Insausti et al., 1998; Pruessner et al.,  
611 2000; Pruessner et al., 2002; Duvernoy, 2005), as well as a delineating software ITK-SNAP  
612 ([www.itksnap.org](http://www.itksnap.org)). The HPC was further divided into its anterior, middle, and posterior parts  
613 given the anatomical and functional variability along the HPC long axis (Poppenk et al.,  
614 2013), the anterior border of pHPC and the posterior border of aHPC were defined by the  
615 appearance of the crus of the fornix and the uncal apex relative to mHPC along the coronal  
616 orientation, respectively (Pruessner et al., 2000; Poppenk et al., 2013). For PFC sub-regions,  
617 we used the AAL template (Rolls et al., 2015), and selected four mPFC sub-regions for ROI-  
618 analysis, which included the rectus, medial orbital gyrus (OFCmed), medial orbital frontal  
619 gyrus (Med\_Orb), and superior medial frontal gyrus (Sup\_Med). All ROIs were resampled  
620 and aligned with the functional volumes, and voxels outside of the brain were excluded.

621

622 **Representational similarity analysis (RSA)**

623 Task-relevant information was decoded using RSA. We tried to dissociate the neural effect of  
624 facing and targeting period based on 4 s duration from each period onset to the end of  
625 following noise period (Zeithamova et al., 2017). First, the trial-based multi-voxel activity  
626 patterns of two periods were obtained by creating two separate univariate general linear  
627 models (GLM). In each GLM, the 4 s blood-oxygen-level-dependent (BOLD) signals of 36  
628 trials (a session) were modeled using boxcar regressors. In addition to the 36 trial-based  
629 regressors of interest, nuisance regressors were included, which included twelve regressors  
630 for modeling the visual patterns of the walking period determined by the maps and walking  
631 directions, three for modeling the character identities in the remaining period (for example, in



632 the facing period GLM, three targeting characters were specified as nuisance regressors  
633 rather than the facing characters), four for modeling head-nodding detection trials, three for  
634 modeling 3 directional cues in the response period, and six motion parameters. This  
635 procedure generated 36 trial-based multi-voxel patterns in participant's native space (2 x 2 x  
636 2.3 mm voxels) for each period, those multi-voxel patterns were normalized prior to  
637 subsequent analysis by subtracting the grand mean pattern of the 36 multi-voxel patterns for  
638 each session (Vass and Epstein, 2013).

639 Searchlight-based RSA. Next, we computed the representational similarity for each spatial  
640 information based on the multi-voxel patterns using a searchlight-based RSA (Libby et al.,  
641 2014; Chadwick et al., 2015), which was conducted using custom Matlab (version R2018b,  
642 [www.mathworks.com/matlab/](http://www.mathworks.com/matlab/)) scripts. In detail, a sphere with a 6 mm radius was constructed  
643 (85 voxels per sphere) for each brain voxel, and the spheres near the edge of the brain with  
644 fewer than ten voxels were excluded from the analysis. The activity parameters within each  
645 sphere were extracted from each of the 36 multi-voxel patterns, resulting in a 36-column by  
646 n-row (number of voxels within the sphere) matrix. The pattern similarity was then calculated  
647 between each column-by-column pair using Pearson's correlation, and was normalized using  
648 Fisher's r-to-z transformation. This procedure finally generated a 36-by-36 correlation matrix  
649 for each period in each brain voxel. Next, given that a multi-voxel pattern contains the  
650 combination of multiple spatial information, we conducted a GLM for each correlation  
651 matrix by specifying multiple categorical regressors to rule out potential influences. Each  
652 spatial representation represented specific spatial information and used either indicator "1  
653 (same)" or "0 (different)" that corresponded with the correlation coefficient of a given  
654 column-to-row cell of the correlation matrix. For the facing period, the GLM contained five  
655 categorical regressors, which included the (1) "map", (2) "walking direction", and (3)  
656 "facing-character identity". Since the participants reported thinking about their bodies



657 rotating between the walking direction and self-orientation relative to the environment, we  
658 also added the (4) “rotation angle” (turn left/right 45°, turn left/right 135°), and (5) their  
659 “self-orientation” into the GLM. For the targeting period, seven regressors were built, which  
660 included: (1) “map”, (2) “walking direction”, (3-4) participants’ “rotation angle” and “self-  
661 orientation”, (5) “targeting-character identity”, and (6-7) “egocentric and allocentric position  
662 of target-character”. It is important to note that the “facing-character identity” was not  
663 included in the targeting period GLM since the effect of each facing character was regressed  
664 out in the GLM computing of multi-voxel activity patterns.  $r^2$  was computed and ranged from  
665 0 to 0.03 for the facing period GLM, and 0 to 0.04 for the targeting period GLM (Table S1).  
666 Each regressor’s parameter was then assigned to the center voxel of each sphere so that a  
667 whole-brain statistical parametric mapping could be generated for each spatial information  
668 for each period, with those spatial representations being finally averaged across the four  
669 scanner sessions. By using this method, spatial information should be successfully decoded if  
670 the regressors stably predict the correlation coefficients in any voxels.

671

672 *ROI-based RSA.* To validate the spatial representations, we further conducted an  
673 independent RSA using anatomical ROIs of MTL and PFC sub-regions. We reasoned that  
674 since searchlight analysis identifies the spatial representations as clusters in small portions of  
675 anatomical regions, if those representations are stable enough, the corresponding anatomical  
676 regions, on average, should show a clear increasing tendency in similarity when spatial  
677 information between trial-pairs are similar compared to different such that they match the  
678 searchlight results. To test this, we separated each ROI into the left and right hemispheres and  
679 generated 20 anatomical masks (Fig. S4a; 12 for the MTL and 8 for the mPFC). The mPFC  
680 masks were normalized into the participants’ native space. The RSA procedure for each ROI  
681 was similar to searchlight analysis, which produced a 36-by-36 correlation matrix for each

682 period. Next, for each spatial information (e.g., map), the correlation matrix elements were z-  
683 transformed and were grouped into “same” and “different” conditions. The mean values of  
684 the matrix elements in the same condition was subtracted by those in the different condition  
685 in each session (36 trials). The subtracted values were averaged across the four sessions for  
686 each participant. We referred to this averaged value as a discrimination score. We tested  
687 whether or not the discrimination score was positive among the participants using one-sample  
688 t-test (one-tail).

### 689 **Functional connectivity (FC) analysis**

690 To investigate the functional networks for different task demands, we examined the whole-  
691 brain FC using each sub-region of MTL and mPFC as seed (Fig. S4a; 12 for the MTL and 8  
692 for the mPFC). In detail, we first removed the nuisance covariates from the preprocessed  
693 functional data by creating a GLM, which specified the signal averaged over the lateral  
694 ventricles, white matter, and whole brain, six motion parameters, and their derivatives as  
695 regressors. The residual signal was bandpass-filtered, leaving signals within the frequency  
696 range 0.01 to 0.1 Hz, and was shifted by two TR intervals (4 s) for subsequent analysis  
697 (Tomparny and Davachi, 2017). We computed a regional time course for each anatomical  
698 mask in each of facing and targeting period. To do this, we averaged signals over the mask at  
699 each TR within the period, and then concatenated the two values in one trial with those in the  
700 next trial within a session (Ranganath et al., 2005). The regional time course for each  
701 anatomical mask was correlated with the time course of each voxel in the rest of the brain,  
702 resulting in a whole-brain correlation map for each period in each scanning session. The  
703 correlation maps were averaged across four scanning sessions for each participant, and were  
704 then submitted to a two-tailed t-test for group level statistics.

705 Each cluster, which derived from the contrast analysis in connectivity between facing  
706 and targeting period based on an initial threshold of  $p=0.001$ , was assigned to each of the

707 three networks based on previous literatures: default-mode network, frontoparietal control  
708 network, and dorsal attention network (Vincent et al., 2008; Schacter et al., 2012; Gelström  
709 and Graziano., 2017). In the present study, default-mode network contains the clusters of  
710 mPFC, MTL, posterior cingulate cortex, and anterior temporal gyrus; frontoparietal control  
711 network contains the clusters of paracingulate gyrus, lateral PFC, and inferior parietal lobule;  
712 dorsal attention network contains the clusters of occipital pole, lateral occipital cortex, cuneal  
713 cortex, lingual gyrus, superior parietal lobule, and postcentral gyrus (Fig. S4b). To examine  
714 modulation effects on the connectivity of MTL/mPFC with the large-scale networks by  
715 different task demands, we computed mean connectivity between each of MTL and mPFC  
716 subregions with each network. For the default-mode network, we prepared for two masks, in  
717 which the MTL or mPFC was removed for the examinations of its connectivity with the  
718 default-mode network.

719

## 720 **Statistics**

721 For searchlight-based RSA, we used an initial threshold of  $p < 0.001$ . If no clusters were  
722 revealed, a more liberal threshold of  $p < 0.01$  was used. For whole brain FC analysis, an  
723 initial threshold of  $p < 0.001$  was used to identify robust network patterns. For both  
724 searchlight-based RSA and whole brain FC analysis, the reliability of significant effects was  
725 tested using a non-parametric statistical inference that does not make assumptions about the  
726 distribution of the data, the test was conducted with the FSL randomise package (version  
727 v2.9, <http://fsl.fmrib.ox.ac.uk/fsl/fslwiki/Randomise>) (Nichols and Holmes, 2002; Winkler et  
728 al., 2014) using 5000 random sign-flips and threshold-free clustering. We then reported  
729 voxels that were significant at  $p < 0.05$  after correcting for multiple comparisons across the  
730 entire brain. ROI-based RSA used one-tailed one sample t-test to examine the significance of  
731 each anatomical mask. Paired t-test was used to examine the difference in connectivity

732 among MTL and mPFC subregions between task demands. All t-test results were Bonferroni-  
733 corrected for multiple comparison ( $\alpha < 0.05$ ). Analysis of variance (ANOVA) was used  
734 to test the influence in connectivity between MTL/mPFC and large-scale functional network  
735 along time periods.

736

737 **Reference**

738

739 Abrahams, S., Pickering, A., Polkey, C. E., & Morris, R. G. (1997). Spatial memory deficits  
740 in patients with unilateral damage to the right hippocampal  
741 formation. *Neuropsychologia*, 35(1), 11-24.

742

743 Andrews, S. C., Hoy, K. E., Enticott, P. G., Daskalakis, Z. J., & Fitzgerald, P. B. (2011).  
744 Improving working memory: the effect of combining cognitive activity and anodal  
745 transcranial direct current stimulation to the left dorsolateral prefrontal cortex. *Brain*  
746 stimulation, 4(2), 84-89.

747

748 Addis, D. R., Wong, A. T., & Schacter, D. L. (2007). Remembering the past and imagining  
749 the future: common and distinct neural substrates during event construction and  
750 elaboration. *Neuropsychologia*, 45(7), 1363-1377.

751

752 Barbey, A. K., Koenigs, M., & Grafman, J. (2013). Dorsolateral prefrontal contributions to  
753 human working memory. *cortex*, 49(5), 1195-1205.

754

755 Brunoni, A. R., & Vanderhasselt, M. A. (2014). Working memory improvement with non-  
756 invasive brain stimulation of the dorsolateral prefrontal cortex: a systematic review and meta-  
757 analysis. *Brain and cognition*, 86, 1-9.

758

759 Bird, C. M., Capponi, C., King, J. A., Doeller, C. F., & Burgess, N. (2010). Establishing the  
760 boundaries: the hippocampal contribution to imagining scenes. *Journal of*  
761 *Neuroscience*, 30(35), 11688-11695.

762

763 Buffalo, E.A. (2015). Bridging the gap between spatial and mnemonic views of the  
764 hippocampal formation. *Hippocampus* 25, 713-718.

765

766 Balaguer, J., Spiers, H., Hassabis, D., & Summerfield, C. (2016). Neural mechanisms of  
767 hierarchical planning in a virtual subway network. *Neuron*, 90(4), 893-903.

768

769 Bradfield, L. A., Dezfouli, A., van Holstein, M., Chieng, B., & Balleine, B. W. (2015).  
770 Medial orbitofrontal cortex mediates outcome retrieval in partially observable task  
771 situations. *Neuron*, 88(6), 1268-1280.

772

773 Brown, T. I., Carr, V. A., LaRocque, K. F., Favila, S. E., Gordon, A. M., Bowles, B., ... &  
774 Wagner, A. D. (2016). Prospective representation of navigational goals in the human  
775 hippocampus. *Science*, 352(6291), 1323-1326.

776

777 Cavanna, A.E., and Trimble, M.R. (2006). The precuneus: a review of its functional anatomy  
778 and behavioural correlates. *Brain : a journal of neurology* 129, 564-583.

779

780 Campbell, K.L., Madore, K.P., Benoit, R.G., Thakral, P.P., and Schacter, D.L. (2018).  
781 Increased hippocampus to ventromedial prefrontal connectivity during the construction of  
782 episodic future events. *Hippocampus* 28, 76-80.

783

784 Chadwick, M. J., Jolly, A. E., Amos, D. P., Hassabis, D., & Spiers, H. J. (2015). A goal  
785 direction signal in the human entorhinal/subicular region. *Current Biology*, 25(1), 87-92.

- 786  
787 Chadwick, M. J., Bonnici, H. M., & Maguire, E. A. (2012). Decoding information in the  
788 human hippocampus: a user's guide. *Neuropsychologia*, 50(13), 3107-3121.  
789
- 790 Duvernoy, H. M. (2005). *The human hippocampus: functional anatomy, vascularization and*  
791 *serial sections with MRI*. Springer Science & Business Media.  
792
- 793 Damasio, H., Grabowski, T., Frank, R., Galaburda, A.M., and Damasio, A.R. (1994). The  
794 return of Phineas Gage: clues about the brain from the skull of a famous patient. *Science* 264,  
795 1102-1105.  
796
- 797 Doeller, C. F., King, J. A., & Burgess, N. (2008). Parallel striatal and hippocampal systems  
798 for landmarks and boundaries in spatial memory. *Proceedings of the National Academy of*  
799 *Sciences*, 105(15), 5915-5920.  
800
- 801 Ekstrom, A.D., Kahana, M.J., Caplan, J.B., Fields, T.A., Isham, E.A., Newman, E.L., and Fried, I.  
802 (2003). Cellular networks underlying human spatial navigation. *Nature* 425, 184-188.  
803
- 804 Eichenbaum, H. (2017). The role of the hippocampus in navigation is memory. *Journal of*  
805 *neurophysiology* 117, 1785-1796.  
806
- 807 Epstein, R.A., Patai, E.Z., Julian, J.B., and Spiers, H.J. (2017). The cognitive map in humans:  
808 spatial navigation and beyond. *Nature neuroscience* 20, 1504-1513.  
809
- 810 Evans, T., Bicanski, A., Bush, D., & Burgess, N. (2016). How environment and self-motion  
811 combine in neural representations of space. *The Journal of physiology*, 594(22), 6535-6546.  
812
- 813 Feierstein, C. E., Quirk, M. C., Uchida, N., Sosulski, D. L., & Mainen, Z. F. (2006).  
814 Representation of spatial goals in rat orbitofrontal cortex. *Neuron*, 51(4), 495-507.  
815
- 816 Funahashi, S. (2017). Prefrontal Contribution to Decision-Making under Free-Choice  
817 Conditions. *Frontiers in neuroscience* 11, 431.  
818
- 819 Gaesser, B., Spreng, R. N., McLelland, V. C., Addis, D. R., & Schacter, D. L. (2013).  
820 Imagining the future: evidence for a hippocampal contribution to constructive  
821 processing. *Hippocampus*, 23(12), 1150-1161.  
822
- 823 Gallagher, M., McMahan, R. W., & Schoenbaum, G. (1999). Orbitofrontal cortex and  
824 representation of incentive value in associative learning. *Journal of Neuroscience*, 19(15),  
825 6610-6614.  
826
- 827 Gelström, K. M., & Graziano, M. S. (2017). The inferior parietal lobule and temporoparietal  
828 junction: a network perspective. *Neuropsychologia*, 105, 70-83.  
829
- 830 Himmelbach, M., Erb, M., and Karnath, H.O. (2006). Exploring the visual world: the neural  
831 substrate of spatial orienting. *NeuroImage* 32, 1747-1759.  
832
- 833 Hargreaves, E.L., Rao, G., Lee, I., and Knierim, J.J. (2005). Major dissociation between  
834 medial and lateral entorhinal input to dorsal hippocampus. *Science* 308, 1792-1794.  
835

- 836 Hassabis, D., & Maguire, E. A. (2007). Deconstructing episodic memory with  
837 construction. *Trends in cognitive sciences*, 11(7), 299-306.  
838
- 839 Insausti, R., Juottonen, K., Soininen, H., Insausti, A. M., Partanen, K., Vainio, P., ... &  
840 Pitkänen, A. (1998). MR volumetric analysis of the human entorhinal, perirhinal, and  
841 temporopolar cortices. *American Journal of Neuroradiology*, 19(4), 659-671.  
842
- 843 Javadi, A.H., Emo, B., Howard, L.R., Zisch, F.E., Yu, Y., Knight, R., Pinelo Silva, J., and  
844 Spiers, H.J. (2017). Hippocampal and prefrontal processing of network topology to simulate  
845 the future. *Nature communications* 8, 14652.  
846
- 847 Jenkinson, M., & Smith, S. (2001). A global optimisation method for robust affine  
848 registration of brain images. *Medical image analysis*, 5(2), 143-156.  
849
- 850 Jimura, K., Konishi, S., and Miyashita, Y. (2004). Dissociable concurrent activity of lateral  
851 and medial frontal lobe during negative feedback processing. *NeuroImage* 22, 1578-1586.  
852
- 853 Karnath, H. O. (2001). New insights into the functions of the superior temporal  
854 cortex. *Nature Reviews Neuroscience*, 2(8), 568.  
855
- 856 Kumaran, D., Summerfield, J. J., Hassabis, D., & Maguire, E. A. (2009). Tracking the  
857 emergence of conceptual knowledge during human decision making. *Neuron*, 63(6), 889-901.  
858
- 859 Kriegeskorte, N., Goebel, R., & Bandettini, P. (2006). Information-based functional brain  
860 mapping. *Proceedings of the National Academy of Sciences*, 103(10), 3863-3868.  
861
- 862 Kriegeskorte, N., Mur, M., Ruff, D. A., Kiani, R., Bodurka, J., Esteky, H., ... & Bandettini, P.  
863 A. (2008). Matching categorical object representations in inferior temporal cortex of man and  
864 monkey. *Neuron*, 60(6), 1126-1141.  
865
- 866 Kable, J.W., and Glimcher, P.W. (2009). The neurobiology of decision: consensus and  
867 controversy. *Neuron* 63, 733-745.  
868
- 869 Konishi, S., Wheeler, M.E., Donaldson, D.I., and Buckner, R.L. (2000). Neural correlates of  
870 episodic retrieval success. *NeuroImage* 12, 276-286.  
871
- 872 Libby, L. A., Hannula, D. E., & Ranganath, C. (2014). Medial temporal lobe coding of item  
873 and spatial information during relational binding in working memory. *Journal of*  
874 *Neuroscience*, 34(43), 14233-14242.  
875
- 876 Meister, M.L.R., and Buffalo, E.A. (2018). Neurons in primate entorhinal cortex represent  
877 gaze position in multiple spatial reference frames. *The Journal of neuroscience : the official*  
878 *journal of the Society for Neuroscience*.  
879
- 880 Miller, E. K., Lundqvist, M., & Bastos, A. M. (2018). Working Memory 2.0. *Neuron*, 100(2),  
881 463-475.  
882
- 883 Moser, E.I., Moser, M.B., and McNaughton, B.L. (2017). Spatial representation in the  
884 hippocampal formation: a history. *Nature neuroscience* 20, 1448-1464.



- 885  
886 Maguire, E. A., Frackowiak, R. S., & Frith, C. D. (1997). Recalling routes around London:  
887 activation of the right hippocampus in taxi drivers. *Journal of neuroscience*, 17(18), 7103-  
888 7110.
- 889  
890 McCormick, C., Ciaramelli, E., De Luca, F., and Maguire, E.A. (2018). Comparing and  
891 Contrasting the Cognitive Effects of Hippocampal and Ventromedial Prefrontal Cortex  
892 Damage: A Review of Human Lesion Studies. *Neuroscience* 374, 295-318.
- 893  
894 Nakazawa, K., Quirk, M.C., Chitwood, R.A., Watanabe, M., Yeckel, M.F., Sun, L.D., Kato,  
895 A., Carr, C.A., Johnston, D., Wilson, M.A., et al. (2002). Requirement for hippocampal CA3  
896 NMDA receptors in associative memory recall. *Science* 297, 211-218.
- 897  
898 Nichols, T. E., & Holmes, A. P. (2002). Nonparametric permutation tests for functional  
899 neuroimaging: a primer with examples. *Human brain mapping*, 15(1), 1-25.
- 900  
901 Naya, Y., and Suzuki, W.A. (2011). Integrating what and when across the primate medial  
902 temporal lobe. *Science* 333, 773-776.
- 903  
904 Naya, Y., Yoshida, M., and Miyashita, Y. (2001). Backward spreading of memory-retrieval  
905 signal in the primate temporal cortex. *Science* 291, 661-664.
- 906  
907 O'Keefe, J., & Dostrovsky, J. (1971). The hippocampus as a spatial map: preliminary  
908 evidence from unit activity in the freely-moving rat. *Brain research*.
- 909  
910 Pruessner, J. C., Li, L. M., Serles, W., Pruessner, M., Collins, D. L., Kabani, N., ... & Evans,  
911 A. C. (2000). Volumetry of hippocampus and amygdala with high-resolution MRI and three-  
912 dimensional analysis software: minimizing the discrepancies between laboratories. *Cerebral*  
913 *cortex*, 10(4), 433-442.
- 914  
915 Pruessner, J. C., Köhler, S., Crane, J., Pruessner, M., Lord, C., Byrne, A., ... & Evans, A. C.  
916 (2002). Volumetry of temporopolar, perirhinal, entorhinal and parahippocampal cortex from  
917 high-resolution MR images: considering the variability of the collateral sulcus. *Cerebral*  
918 *Cortex*, 12(12), 1342-1353.
- 919  
920 Packard, M.G., and McGaugh, J.L. (1996). Inactivation of hippocampus or caudate nucleus  
921 with lidocaine differentially affects expression of place and response learning. *Neurobiology*  
922 *of learning and memory* 65, 65-72.
- 923  
924 Poppenk, J., Evensmoen, H. R., Moscovitch, M., & Nadel, L. (2013). Long-axis  
925 specialization of the human hippocampus. *Trends in cognitive sciences*, 17(5), 230-240.
- 926  
927 Price, A. R., Peelle, J. E., Bonner, M. F., Grossman, M., & Hamilton, R. H. (2016). Causal  
928 evidence for a mechanism of semantic integration in the angular gyrus as revealed by high-  
929 definition transcranial direct current stimulation. *Journal of Neuroscience*, 36(13), 3829-  
930 3838.
- 931  
932 Ranganath, C., Heller, A., Cohen, M. X., Brozinsky, C. J., & Rissman, J. (2005). Functional  
933 connectivity with the hippocampus during successful memory  
934 formation. *Hippocampus*, 15(8), 997-1005.



- 935  
936 Ranganath, C., & Ritchey, M. (2012). Two cortical systems for memory-guided  
937 behaviour. *Nature Reviews Neuroscience*, 13(10), 713.  
938
- 939 Rolls, E. T., Joliot, M., & Tzourio-Mazoyer, N. (2015). Implementation of a new parcellation  
940 of the orbitofrontal cortex in the automated anatomical labeling atlas. *Neuroimage*, 122, 1-5.  
941
- 942 Redish, A.D., and Touretzky, D.S. (1998). The role of the hippocampus in solving the Morris  
943 water maze. *Neural computation* 10, 73-111.  
944
- 945 Seghier, M. L. (2013). The angular gyrus: multiple functions and multiple subdivisions. *The*  
946 *Neuroscientist*, 19(1), 43-61.  
947
- 948 Suarez-Jimenez, B., Bisby, J. A., Horner, A. J., King, J. A., Pine, D. S., & Burgess, N.  
949 (2018). Linked networks for learning and expressing location-specific threat. *Proceedings of*  
950 *the National Academy of Sciences*, 115(5), E1032-E1040.  
951
- 952 Spiers, H. J., & Maguire, E. A. (2007). A navigational guidance system in the human  
953 brain. *Hippocampus*, 17(8), 618-626.  
954
- 955 Schinazi, V. R., Nardi, D., Newcombe, N. S., Shipley, T. F., & Epstein, R. A. (2013).  
956 Hippocampal size predicts rapid learning of a cognitive map in humans. *Hippocampus*, 23(6),  
957 515-528.  
958
- 959 Squire, L.R., and Zola-Morgan, J.T. (2011). The cognitive neuroscience of human memory since  
960 H.M. *Annual review of neuroscience* 34, 259-288.  
961
- 962 Schacter, D.L., Addis, D.R., and Buckner, R.L. (2007). Remembering the past to imagine the  
963 future: the prospective brain. *Nature reviews Neuroscience* 8, 657-661.  
964
- 965 Spreng, R. N., & Schacter, D. L. (2011). Default network modulation and large-scale network  
966 interactivity in healthy young and old adults. *Cerebral Cortex*, 22(11), 2610-2621.  
967
- 968 Schacter, D.L. (2012). Adaptive constructive processes and the future of memory. *The*  
969 *American psychologist* 67, 603-613.  
970
- 971 Schacter, D. L., Addis, D. R., Hassabis, D., Martin, V. C., Spreng, R. N., & Szpunar, K. K.  
972 (2012). The future of memory: remembering, imagining, and the brain. *Neuron*, 76(4), 677-  
973 694.  
974
- 975 Stolk, A., D'Imperio, D., di Pellegrino, G., and Toni, I. (2015). Altered communicative  
976 decisions following ventromedial prefrontal lesions. *Current biology : CB* 25, 1469-1474.  
977
- 978 Saxena, S., Brody, A. L., Schwartz, J. M., & Baxter, L. R. (1998). Neuroimaging and frontal-  
979 subcortical circuitry in obsessive-compulsive disorder. *The British Journal of*  
980 *Psychiatry*, 173(S35), 26-37.  
981
- 982 Suzuki, W., and Naya, Y. (2011). Two routes for remembering the past. *Cell* 147, 493-495.  
983

- 984 Suzuki, W.A., and Naya, Y. (2014). The perirhinal cortex. *Annual review of neuroscience* 37,  
985 39-53.
- 986
- 987 Tolman, E. C. (1948). Cognitive maps in rats and men. *Psychological review*, 55(4), 189.  
988
- 989 Tavares, R. M., Mendelsohn, A., Grossman, Y., Williams, C. H., Shapiro, M., Trope, Y., &  
990 Schiller, D. (2015). A map for social navigation in the human brain. *Neuron*, 87(1), 231-243.  
991
- 992 Tulving, E. (2002). Episodic memory: from mind to brain. *Annual review of*  
993 *psychology*, 53(1), 1-25.  
994
- 995 Tompary, A., & Davachi, L. (2017). Consolidation promotes the emergence of  
996 representational overlap in the hippocampus and medial prefrontal cortex. *Neuron*, 96(1),  
997 228-241.  
998
- 999 Vincent, J. L., Kahn, I., Snyder, A. Z., Raichle, M. E., & Buckner, R. L. (2008). Evidence for  
1000 a frontoparietal control system revealed by intrinsic functional connectivity. *Journal of*  
1001 *neurophysiology*, 100(6), 3328-3342.  
1002
- 1003 Vass LK, Epstein RA (2013) Abstract representations of location and facing direction in the  
1004 human brain. *J Neurosci* 33:6133–6142. CrossRef Medline  
1005
- 1006 Woollett, K., & Maguire, E. A. (2011). Acquiring “the Knowledge” of London's layout  
1007 drives structural brain changes. *Current biology*, 21(24), 2109-2114.  
1008
- 1009 Winkler, A. M., Ridgway, G. R., Webster, M. A., Smith, S. M., & Nichols, T. E. (2014).  
1010 Permutation inference for the general linear model. *Neuroimage*, 92, 381-397.  
1011
- 1012 Wang, C., Chen, X., Lee, H., Deshmukh, S.S., Yoganarasimha, D., Savelli, F., and Knierim,  
1013 J.J. (2018). Egocentric coding of external items in the lateral entorhinal cortex. *Science* 362,  
1014 945-949.  
1015
- 1016 Woolrich, M. W., Ripley, B. D., Brady, M., & Smith, S. M. (2001). Temporal  
1017 Autocorrelation in Univariate Linear Modeling of fMRI Data. *NeuroImage*, 14(6), 1370–  
1018 1386.  
1019
- 1020 Woolrich, M. W., Behrens, T. E. J., & Smith, S. M. (2004). Constrained linear basis sets for  
1021 HRF modelling using Variational Bayes. *NeuroImage*, 21(4), 1748–1761.  
1022
- 1023 Wikenheiser, A. M., & Schoenbaum, G. (2016). Over the river, through the woods: cognitive  
1024 maps in the hippocampus and orbitofrontal cortex. *Nature Reviews Neuroscience*, 17(8), 513.  
1025
- 1026 Young, J. J., & Shapiro, M. L. (2011). Dynamic coding of goal-directed paths by orbital  
1027 prefrontal cortex. *Journal of Neuroscience*, 31(16), 5989-6000.  
1028
- 1029 Yamada, H., Louie, K., Tymula, A., and Glimcher, P.W. (2018). Free choice shapes  
1030 normalized value signals in medial orbitofrontal cortex. *Nature communications* 9, 162.  
1031
- 1032 Zeithamova, D., de Araujo Sanchez, M. A., & Adke, A. (2017). Trial timing and pattern-  
1033 information analyses of fMRI data. *Neuroimage*, 153, 221-231.
